# Supplementary material
Source: PubMed Central journal article supplement (PMC3100133)
Supplement: supp_76.20.1726_Table_e-1.pdf [file supp_76.20.1726_Table_e-1.pdf]

| Table e-1: Meta-analysis Dataset |           |          |                  |                  |    |       |                                     |                                 |                                    |                       |                                                                                                            |                  |                                |                                                                                                                                                                                                                                                                                                                                                                                                                                                                                                 |                                                                 |                                                                                                                                                                                                |     |
|----------------------------------|-----------|----------|------------------|------------------|----|-------|-------------------------------------|---------------------------------|------------------------------------|-----------------------|------------------------------------------------------------------------------------------------------------|------------------|--------------------------------|-------------------------------------------------------------------------------------------------------------------------------------------------------------------------------------------------------------------------------------------------------------------------------------------------------------------------------------------------------------------------------------------------------------------------------------------------------------------------------------------------|-----------------------------------------------------------------|------------------------------------------------------------------------------------------------------------------------------------------------------------------------------------------------|-----|
| Study ID                         | Reference | Modality | Language         | Control          |    |       | Months since Stroke: Median (Range) | Fluency                         | Task                               | Control               | Comments                                                                                                   | Control          |                                | Narrative Description of Studies                                                                                                                                                                                                                                                                                                                                                                                                                                                                |                                                                 |                                                                                                                                                                                                |     |
|                                  |           |          |                  | Aphasic N        | N  | IF+ N |                                     |                                 |                                    |                       |                                                                                                            | Foci             | Foci                           |                                                                                                                                                                                                                                                                                                                                                                                                                                                                                                 |                                                                 |                                                                                                                                                                                                |     |
| 1a                               | e-1       | fMRI     | American English | 4                | 1  | 1     | 48                                  | Nonfluent                       | Picture Naming                     | Fixation              | Patient 1; All responses anal<br>Control 1, Patient 1; AOA anal<br>Control 1, Patient 1, Names/Target anal | 12               | 10                             | This study used a single trial design to separate activity during correct and incorrect naming responses and relate activity to item attributes. Typical bilateral activation patterns were observed, but RH activity occurred more during incorrect responses. The authors conclude that "right frontal overactivation may reflect ineffective effort when left hemisphere perilesional resources are insufficient" and that RH areas play a "dysfunctional" role in chronic aphasic patients. |                                                                 |                                                                                                                                                                                                |     |
| 1b                               |           | fMRI     | American English | (1)              | "  | "     |                                     |                                 | Picture Naming                     | Fixation              |                                                                                                            | (8)              | (13)                           |                                                                                                                                                                                                                                                                                                                                                                                                                                                                                                 |                                                                 |                                                                                                                                                                                                |     |
| 1c                               |           | fMRI     | American English | "                | "  | "     |                                     |                                 | Picture Naming                     | Fixation              |                                                                                                            | (6)              | (10)                           |                                                                                                                                                                                                                                                                                                                                                                                                                                                                                                 |                                                                 |                                                                                                                                                                                                |     |
| 1a                               |           | fMRI     | American English | "                | 1  | 1     |                                     |                                 | 108                                | Nonfluent             |                                                                                                            | Picture Naming   | Fixation                       |                                                                                                                                                                                                                                                                                                                                                                                                                                                                                                 | Patient 2; All responses anal<br>Control 2, Patient 2; AOA anal | -                                                                                                                                                                                              | 10  |
| 1b                               |           | fMRI     | American English | (1)              | "  | "     |                                     |                                 |                                    |                       |                                                                                                            | Picture Naming   | Fixation                       |                                                                                                                                                                                                                                                                                                                                                                                                                                                                                                 |                                                                 | (2)                                                                                                                                                                                            | (3) |
| 1c                               |           | fMRI     | American English | "                | "  | "     |                                     |                                 |                                    |                       |                                                                                                            | Picture Naming   | Fixation                       |                                                                                                                                                                                                                                                                                                                                                                                                                                                                                                 |                                                                 | (6)                                                                                                                                                                                            | (5) |
| 1a                               |           | fMRI     | American English | "                | 1  | 1     | 48                                  | Nonfluent                       | Picture Naming                     | Fixation              | Patient 3; All responses anal<br>Control 3, Patient 3; AOA anal                                            | -                | 11                             |                                                                                                                                                                                                                                                                                                                                                                                                                                                                                                 |                                                                 |                                                                                                                                                                                                |     |
| 1b                               |           | fMRI     | American English | (1)              | "  | "     |                                     |                                 | Picture Naming                     | Fixation              |                                                                                                            | (9)              | (12)                           |                                                                                                                                                                                                                                                                                                                                                                                                                                                                                                 |                                                                 |                                                                                                                                                                                                |     |
| 1c                               |           | fMRI     | American English | "                | "  | "     |                                     |                                 | Picture Naming                     | Fixation              |                                                                                                            | (2)              | (9)                            |                                                                                                                                                                                                                                                                                                                                                                                                                                                                                                 |                                                                 |                                                                                                                                                                                                |     |
| 1b                               |           | fMRI     | American English | (1)              | -  | -     |                                     |                                 | Picture Naming                     | Fixation              | Control 4; AOA anal<br>Control 1; Names/Target anal                                                        | (7)              | -                              |                                                                                                                                                                                                                                                                                                                                                                                                                                                                                                 |                                                                 |                                                                                                                                                                                                |     |
| 1c                               |           | fMRI     | American English | "                | -  | -     |                                     |                                 | Picture Naming                     | Fixation              |                                                                                                            | (11)             | -                              |                                                                                                                                                                                                                                                                                                                                                                                                                                                                                                 |                                                                 |                                                                                                                                                                                                |     |
| 2a                               |           | e-2      | fMRI             | American English | 14 | 1     |                                     |                                 | 1                                  | 36                    |                                                                                                            | Nonfluent        | Lexical Decision (Nouns+Verbs) |                                                                                                                                                                                                                                                                                                                                                                                                                                                                                                 | Fixation                                                        | Nouns/verbs collapsed; Patient a1<br>v3-v1 analysis; Patient a1<br>v3-v1 analysis; Patient a2<br>v3-v1 analysis; Patient a3<br>Nouns/verbs collapsed; Patient a4<br>v3-v1 analysis; Patient a4 | 38  |
| 2b                               | fMRI      |          | American English | "                | "  | "     |                                     |                                 | Lexical Decision (Nouns+Verbs)     |                       |                                                                                                            |                  | Fixation                       | (1)                                                                                                                                                                                                                                                                                                                                                                                                                                                                                             | (3)                                                             |                                                                                                                                                                                                |     |
| 2b                               | fMRI      |          | American English | "                | 1  | 0     | 108                                 | Nonfluent                       | Lexical Decision (Nouns+Verbs)     |                       | Fixation                                                                                                   |                  | "                              | (3)                                                                                                                                                                                                                                                                                                                                                                                                                                                                                             |                                                                 |                                                                                                                                                                                                |     |
| 2b                               | fMRI      |          | American English | "                | 1  | 1     |                                     |                                 | Lexical Decision (Nouns+Verbs)     |                       | Fixation                                                                                                   |                  | "                              | (1)                                                                                                                                                                                                                                                                                                                                                                                                                                                                                             |                                                                 |                                                                                                                                                                                                |     |
| 2a                               | fMRI      |          | American English | "                | 1  | 1     | 120                                 | Nonfluent                       | Lexical Decision (Nouns+Verbs)     |                       | Fixation                                                                                                   |                  | "                              | (3)                                                                                                                                                                                                                                                                                                                                                                                                                                                                                             |                                                                 |                                                                                                                                                                                                |     |
| 2b                               | fMRI      |          | American English | "                | "  | "     |                                     |                                 | Lexical Decision (Nouns+Verbs)     |                       | Fixation                                                                                                   |                  | "                              | (2)                                                                                                                                                                                                                                                                                                                                                                                                                                                                                             |                                                                 |                                                                                                                                                                                                |     |
| 3a                               | e-3       | fMRI     | German           | 8                | 16 | 14    | >12                                 | Nonfluent                       | Word Reading                       | Fixation              | Pre-therapy scan                                                                                           | 4                | 7                              | This study evaluated changes in activity after constraint-induced aphasia therapy. Right IFG activity predicted success of therapy, which correlated with decreasing right IFG activity. The authors conclude that right IFG activity is associated with "less effective strategies for language processing."                                                                                                                                                                                   |                                                                 |                                                                                                                                                                                                |     |
| 3b                               |           | fMRI     | German           | "                | "  | "     |                                     |                                 | Word Stem Completion               | Fixation              |                                                                                                            | Pre-therapy scan | 7                              |                                                                                                                                                                                                                                                                                                                                                                                                                                                                                                 | 5                                                               |                                                                                                                                                                                                |     |
| 4                                | e-4       | fMRI     | German           | 14               | 14 | 5     | 11.3 (3.4-17.1)                     | 9 Nonfluent                     | Intelligible Speech discrimination | Reversed Speech       | Acute/subacute patient scans excluded                                                                      | 9                | 7                              | This is a longitudinal study examining changes in activity from the acute to the chronic phase of aphasia. Typical RH homotopic activity dominated in the subacute phase, which related to improvement in language. Chronically, activity shifted back to spared LH areas. The authors conclude that recovery is a dynamic process involving productive recruitment of both the RH and LH at different times.                                                                                   |                                                                 |                                                                                                                                                                                                |     |
| 5                                | e-5       | fMRI     | British English  | 18               | 9  | 3     | 38 (13-95)                          | Unknown                         | Listening to Stories               | Reversed Speech       | Control Patients                                                                                           | 19               | 16                             | This study compared patients with an without Wernicke's area lesions in their activity during speech perception. Bilateral temporal lobe activity was seen in both groups of aphasic patients, but left anterior temporal areas were less active when Wernicke's area was lesioned. The authors conclude that the role of anterior temporal cortex in speech comprehension has been underestimated.                                                                                             |                                                                 |                                                                                                                                                                                                |     |
| 5                                |           | fMRI     | British English  | "                | 8  | 5     | 26.5 (4-125)                        | Unknown                         | Listening to Stories               | Reversed Speech       | Temporal Patients                                                                                          | "                | 8                              |                                                                                                                                                                                                                                                                                                                                                                                                                                                                                                 |                                                                 |                                                                                                                                                                                                |     |
| 6a                               | e-6       | PET      | British English  | 12               | 7  | 7     | 39 (19-134)                         | Nonfluent                       | Propositional Speech Production    | Rest ("Nonspeech")    | POP+ Patients                                                                                              | 11               | 9                              | This study compared activity during speech production in patients with and without POP lesions. Activity in the right POP was only observed for patients with lesions to the left POP. The authors conclude that a left POP lesion induces a change in function of the right POP, but stop short of interpreting this activity as either productive or maladaptive.                                                                                                                             |                                                                 |                                                                                                                                                                                                |     |
| 6b                               |           | PET      | British English  | "                | "  | "     | "                                   | Propositional Speech Production | Counting                           | POP+ Patients         | (13)                                                                                                       | (6)              |                                |                                                                                                                                                                                                                                                                                                                                                                                                                                                                                                 |                                                                 |                                                                                                                                                                                                |     |
| 6a                               |           | PET      | British English  | "                | 7  | 7     | 17 (6-240)                          | Nonfluent                       | Propositional Speech Production    | Rest ("Nonspeech")    | POP- Patients                                                                                              | "                | (10)                           |                                                                                                                                                                                                                                                                                                                                                                                                                                                                                                 |                                                                 |                                                                                                                                                                                                |     |
| 6b                               |           | PET      | British English  | "                | "  | "     | "                                   | Propositional Speech Production | Counting                           | POP- Patients         | "                                                                                                          | (8)              |                                |                                                                                                                                                                                                                                                                                                                                                                                                                                                                                                 |                                                                 |                                                                                                                                                                                                |     |
| 7                                | e-7       | PET      | French           | 6                | 8  | 2     | 12.6 (10.7-15.3)                    | 1 Nonfluent                     | Verb/Noun Generation               | Rest                  | Subacute patient scan excluded                                                                             | 13               | 13                             | This study evaluated changes in activity from the subacute to the chronic phase of aphasia. Bilateral perisylvian activity increased over this period. Bilateral STG activity changes correlated with improved performance.                                                                                                                                                                                                                                                                     |                                                                 |                                                                                                                                                                                                |     |
| 8a                               | e-8       | fMRI     | Italian          | 10               | 1  | 0     | 12                                  | Fluent                          | Phonemic Fluency                   | Rest                  | Patient 1<br>Patient 1<br>Patient 2<br>Patient 2<br>Patient 3<br>Patient 4                                 | 21               | 4                              | This study evaluated activity for word retrieval tasks (phonemic and semantic fluency) in aphasia. Both tasks resulted in bilateral frontal activity, more extensive for semantic fluency. Phonemic fluency performance was related to activity in Broca's area or the RH homotopic site. The authors conclude that phonemic fluency depends on left IFG when it is intact, and right IFG when the left is lesioned.                                                                            |                                                                 |                                                                                                                                                                                                |     |
| 8b                               |           | fMRI     | Italian          | "                | "  | "     |                                     |                                 | Semantic Fluency                   | Rest                  |                                                                                                            | Patient 1        | 18                             |                                                                                                                                                                                                                                                                                                                                                                                                                                                                                                 | 15                                                              |                                                                                                                                                                                                |     |
| 8a                               |           | fMRI     | Italian          | "                | 1  | 1     |                                     |                                 | 12                                 | Fluent                |                                                                                                            | Phonemic Fluency | Rest                           |                                                                                                                                                                                                                                                                                                                                                                                                                                                                                                 | "                                                               | 6                                                                                                                                                                                              |     |
| 8b                               |           | fMRI     | Italian          | "                | "  | "     |                                     |                                 |                                    |                       |                                                                                                            | Semantic Fluency | Rest                           |                                                                                                                                                                                                                                                                                                                                                                                                                                                                                                 | Patient 2                                                       | "                                                                                                                                                                                              | 11  |
| 8b                               |           | fMRI     | Italian          | "                | 1  | 0     |                                     |                                 | 10                                 | Fluent                |                                                                                                            | Semantic Fluency | Rest                           |                                                                                                                                                                                                                                                                                                                                                                                                                                                                                                 | "                                                               | 7                                                                                                                                                                                              |     |
| 8b                               |           | fMRI     | Italian          | "                | 1  | 0     |                                     |                                 |                                    |                       |                                                                                                            | 24               | Nonfluent                      |                                                                                                                                                                                                                                                                                                                                                                                                                                                                                                 | Semantic Fluency                                                | Rest                                                                                                                                                                                           | "   |
| 9                                | e-9       | fMRI     | American English | 14               | 8  | 8     | >6                                  | Nonfluent                       | Word Stem Completion (Novel Items) | Repeat Items          | -                                                                                                          | 9                | 5                              | This study examined changes in activity during a verbal learning task in aphasic patients. Learning was associated with decreased responses in right frontal and occipital cortex. The authors conclude that the RH serves a compensatory role in aphasia recovery.                                                                                                                                                                                                                             |                                                                 |                                                                                                                                                                                                |     |
| 10a                              | e-10      | fMRI     | American English | 8                | 6  | 6     | 46.9 (10.7-117.5)                   | Nonfluent                       | Silent Word Stem Completion        | Fixation              | -                                                                                                          | 6                | 6                              | This study examined lexical processing activity in patients with left IFG lesions. Increased activity was seen in the right IFG, which did not correlate with performance. Perilesional LH activity was observed in the two highest performing patients. The authors conclude that LH sparing is functionally important, and RH activity results from alternate behavioral strategies or "an anomalous response caused by removal of the left IFG."                                             |                                                                 |                                                                                                                                                                                                |     |
| 10b                              |           | PET      | American English | 6                | "  | "     | "                                   | "                               | Aloud Word Stem Completion         | Fixation              | -                                                                                                          | 5                | 6                              |                                                                                                                                                                                                                                                                                                                                                                                                                                                                                                 |                                                                 |                                                                                                                                                                                                |     |
| 11                               | e-11      | PET      | British English  | 4                | 1  | 0     | Unknown (6-14)                      | Fluent                          | Verb Generation                    | Rest                  | L & R Control group; Patient 1                                                                             | 8                | 4                              | This study examined activity in aphasic patients during verb generation. A left lateralized pattern of activity was seen in controls although some RH activity was seen. A rightward shift in activity was not seen in aphasics. The authors conclude that perilesional LH tissue is important for recovery from aphasia.                                                                                                                                                                       |                                                                 |                                                                                                                                                                                                |     |
| 11                               |           | PET      | British English  | 5                | 1  | 0     | Unknown (6-14)                      | Fluent                          | Verb Generation                    | Rest                  | L only Control group Patient 2                                                                             | 6                | 6                              |                                                                                                                                                                                                                                                                                                                                                                                                                                                                                                 |                                                                 |                                                                                                                                                                                                |     |
| 11                               |           | PET      | British English  | "                | 1  | 0     | Unknown (6-14)                      | Fluent                          | Verb Generation                    | Rest                  | Patient 4                                                                                                  | "                | 6                              |                                                                                                                                                                                                                                                                                                                                                                                                                                                                                                 |                                                                 |                                                                                                                                                                                                |     |
| 11                               |           | PET      | British English  | "                | 1  | 0     | Unknown (6-14)                      | Fluent                          | Verb Generation                    | Rest                  | Patient 5                                                                                                  | "                | 6                              |                                                                                                                                                                                                                                                                                                                                                                                                                                                                                                 |                                                                 |                                                                                                                                                                                                |     |
| 11                               |           | PET      | British English  | "                | 1  | 1     | Unknown (6-14)                      | Fluent                          | Verb Generation                    | Rest                  | Patient 6                                                                                                  | "                | 5                              |                                                                                                                                                                                                                                                                                                                                                                                                                                                                                                 |                                                                 |                                                                                                                                                                                                |     |
| 12a                              | e-12      | PET      | German           | 6                | 6  | 0     | 30.5 (5-117)                        | Fluent                          | Verb Generation                    | Rest                  | -                                                                                                          | 7                | 7                              | This study examined activity during verb generation in patients with recovered Wernicke's aphasia. In aphasic patients, LH activity was seen in spared frontal areas. RH areas homotopic to normal language areas were also active. The authors conclude that recovery from aphasia relies on recruitment of a pre-existing bilateral network of brain regions.                                                                                                                                 |                                                                 |                                                                                                                                                                                                |     |
| 12b                              |           | PET      | German           | "                | "  | "     | "                                   | "                               | Pseudoword Repetition              | Rest                  | -                                                                                                          | 4                | 5                              |                                                                                                                                                                                                                                                                                                                                                                                                                                                                                                 |                                                                 |                                                                                                                                                                                                |     |
| 12c                              |           | PET      | German           | "                | "  | "     | "                                   | "                               | Verb Generation                    | Pseudoword Repetition | -                                                                                                          | (3)              | (3)                            |                                                                                                                                                                                                                                                                                                                                                                                                                                                                                                 |                                                                 |                                                                                                                                                                                                |     |
| 12d                              |           | PET      | German           | "                | "  | "     | "                                   | "                               | Pseudoword Repetition              | Verb Generation       | -                                                                                                          | (2)              | (1)                            |                                                                                                                                                                                                                                                                                                                                                                                                                                                                                                 |                                                                 |                                                                                                                                                                                                |     |
