# Supplementary material
Source: PubMed Central journal article supplement (PMC3100133)
Supplement: supp_76.20.1726_Table_e-2.pdf [file supp_76.20.1726_Table_e-2.pdf]

**Table e-2: ALE Results.** Functional homology scores in bold are significant after multiple comparison correction at FDR q = .05.

\*also significant at FDR = .001.

| Location                    | BA | Extent (mm <sup>3</sup> ) | X   | Y   | Z   | ALE Value (x10 <sup>-3</sup> ) | Corresponding Control Peak | Distance to Corresponding Control Peak (mm) | Functional Homology Z-Score | Experiments Reporting Activity |
|-----------------------------|----|---------------------------|-----|-----|-----|--------------------------------|----------------------------|---------------------------------------------|-----------------------------|--------------------------------|
| <b>Controls</b>             |    |                           |     |     |     |                                |                            |                                             |                             |                                |
| Left                        |    |                           |     |     |     |                                |                            |                                             |                             |                                |
| Frontal                     |    |                           |     |     |     |                                |                            |                                             |                             |                                |
| IFG- POrb                   | 47 | 648                       | -46 | 24  | -4  | 16.47*                         |                            |                                             |                             | 1a,1b,1c,4,8a,10b,12c          |
| IFG- PTr                    | 45 | 2032                      | -56 | 22  | 14  | 15.76*                         |                            |                                             |                             | 1a,5,6b,8a,11,12a              |
| IFG- PTr                    | 45 |                           | -44 | 24  | 20  | 13.11*                         |                            |                                             |                             | 1b,1c,8a,10a,11                |
| IFG- POp                    | 44 |                           | -50 | 14  | 14  | 14.82*                         |                            |                                             |                             | 1a,1b,5,11,12a,12b             |
| IFG- POp                    | 44 |                           | -44 | 14  | 24  | 9.83                           |                            |                                             |                             | 1a,1b,4,10a                    |
| WM/Insula                   |    | 848                       | -30 | 18  | 0   | 16.48*                         |                            |                                             |                             | 1b,2a,9,10a,12a                |
| Precentral G                | 6  | 640                       | -52 | -2  | 48  | 11.69                          |                            |                                             |                             | 1a,1b,6a,11                    |
| Precentral G                | 6  |                           | -48 | 2   | 40  | 11.25                          |                            |                                             |                             | 1a,1b,9,11                     |
| Temporal                    |    |                           |     |     |     |                                |                            |                                             |                             |                                |
| MTG                         | 22 | 792                       | -58 | -40 | 2   | 14.34*                         |                            |                                             |                             | 2a,4,5,11                      |
| Mid                         |    |                           |     |     |     |                                |                            |                                             |                             |                                |
| SMA                         | 32 | 1368                      | 6   | 20  | 48  | 16.04*                         |                            |                                             |                             | 1b,3b,4,8a,10b                 |
| SMA                         | 6  |                           | -2  | 14  | 54  | 11.41                          |                            |                                             |                             | 1a,1b,1c,8a,11                 |
| Right                       |    |                           |     |     |     |                                |                            |                                             |                             |                                |
| Internal Capsule            |    | 256                       | 22  | -10 | 10  | 12.1                           |                            |                                             |                             | 2a,6a,8a                       |
| Middle Occ G                | 18 | 152                       | 26  | -94 | 6   | 11.68                          |                            |                                             |                             | 2a,3b,9                        |
| <b>All Aphasic Patients</b> |    |                           |     |     |     |                                |                            |                                             |                             |                                |
| Left                        |    |                           |     |     |     |                                |                            |                                             |                             |                                |
| Frontal                     |    |                           |     |     |     |                                |                            |                                             |                             |                                |
| IFG- POrb                   | 47 | 128                       | -44 | 30  | -22 | 13.13*                         | (-46,24,-4)                | 19.1                                        | 1.59                        | 1a,1b,1c,2a,5                  |
| IFG- POrb                   | 47 | 248                       | -54 | 28  | -8  | 11.98*                         | (-46,24,-4)                | 9.8                                         | <b>2.73</b>                 | 1a,1b,1c,2a,4,5,8a             |
| IFG- PTr                    | 45 | 160                       | -60 | 24  | 10  | 9.27                           | (-56,22,14)                | 6.0                                         | <b>2.88</b>                 | 1a,1b,1c,5,8a,8b,11,12a        |
| IFG- POp                    | 44 | 176                       | -48 | 12  | 14  | 9.14                           | (-50,14,14)                | 2.8                                         | <b>2.43</b>                 | 1a,1b,5,8a,8b,11               |
| Insula                      |    | 928                       | -42 | 16  | 4   | 12.12*                         | (-46,24,-4) ; (-30,18,0)   | 12.0 ; 12.8                                 | <b>2.34</b> ; -0.71         | 1a,1b,1c,6a,8a,8b,10b,11,12b   |
| MFG                         | 46 | 416                       | -32 | 46  | 24  | 11.21*                         | (-44,24,20)                | 25.4                                        | 0.19                        | 1a,6a,7,8b,11                  |
| Temporal                    |    |                           |     |     |     |                                |                            |                                             |                             |                                |
| MTG                         | 21 | 520                       | -56 | -44 | 0   | 11.73*                         | (-58,-40,2)                | 4.9                                         | <b>3.47</b>                 | 4,5,11                         |
| MTG                         | 22 | 248                       | -66 | -38 | 2   | 8.69                           | (-58,-40,2)                | 8.2                                         | <b>2.35</b>                 | 2a,7,11                        |
| Mid                         |    |                           |     |     |     |                                |                            |                                             |                             |                                |
| SMA                         | 6  | 520                       | -4  | 2   | 60  | 10.88*                         | (-2,14,54)                 | 13.6                                        | 1.15                        | 1a,1b,6a,10a,10b               |
| Right                       |    |                           |     |     |     |                                |                            |                                             |                             |                                |
| Frontal                     |    |                           |     |     |     |                                |                            |                                             |                             |                                |
| IFG- POrb                   | 47 | 256                       | 44  | 30  | -8  | 10.02*                         | (-46,24,-4)                | 7.5                                         | 1.83                        | 1a,1b,1c,3a,8a,8b,12b          |
| IFG- PTr                    | 45 | 904                       | 54  | 24  | 18  | 11.11*                         | (-56,22,14)                | 4.9                                         | 0.30                        | 1a,1b,1c,3a,4,8b,11            |
| IFG- Ventral POp            | 45 | 816                       | 52  | 20  | 2   | 12.36*                         | (-46,24,-4) ; (-50,14,14)  | 9.4 ; 13.6                                  | 0.70 ; <b>2.73</b>          | 1a,1b,1c,2a,6a,8b,11,12a,12b   |
| IFG- Dorsal POp             | 44 | 312                       | 44  | 10  | 30  | 10.71*                         | (-44,14,24)                | 7.2                                         | 1.83                        | 1a,3b,8b,10a                   |
| Insula                      |    | 232                       | 42  | 12  | 4   | 9.85                           | (-50,14,14) ; (-30,18,0)   | 13.0 ; 14.0                                 | 1.84 ; 1.15                 | 1a,1b,8b,10a,12b               |
| Precentral G                | 4  | 400                       | 60  | -6  | 44  | 13.35*                         | (-52,-2,48)                | 9.8                                         | <b>2.35</b>                 | 1a,3b,6a                       |
| Postcentral G               | 4  | 304                       | 48  | -6  | 34  | 11.25*                         | (-48,2,40)                 | 10.0                                        | <b>2.35</b>                 | 1a,6a,9                        |
| Temporal                    |    |                           |     |     |     |                                |                            |                                             |                             |                                |
| MTG                         | 22 | 488                       | 64  | -36 | 2   | 10.04*                         | (-58,-40,2)                | 7.2                                         | 0.88                        | 2a,2b,7,8a,11,12a,12b          |
| <b>IF+ Patients</b>         |    |                           |     |     |     |                                |                            |                                             |                             |                                |
| Left                        |    |                           |     |     |     |                                |                            |                                             |                             |                                |
| Frontal                     |    |                           |     |     |     |                                |                            |                                             |                             |                                |
| Insula                      |    | 256                       | -40 | 18  | 4   | 8.53*                          | (-46,24,-4) ; (-30,18,0)   | 11.7 ; 10.8                                 | <b>2.72</b> ; 0.12          | 1a,1b,1c,6a,10b                |
| Mid                         |    |                           |     |     |     |                                |                            |                                             |                             |                                |
| SMA                         | 6  | 816                       | -4  | 2   | 60  | 10.87*                         | (-2,14,54)                 | 13.6                                        | 0.62                        | 1a,1b,6a,10a,10b               |
| Right                       |    |                           |     |     |     |                                |                            |                                             |                             |                                |
| Frontal                     |    |                           |     |     |     |                                |                            |                                             |                             |                                |
| IFG- POrb                   | 47 | 160                       | 44  | 30  | -8  | 8.92*                          | (-46,24,-4)                | 7.5                                         | <b>2.40</b>                 | 1a,1b,1c,3a,8a,8b              |
| IFG- PTr                    | 45 | 208                       | 54  | 24  | 18  | 8.49*                          | (-56,22,14)                | 4.9                                         | 0.12                        | 1a,1b,1c,3a,11                 |
| IFG- Dorsal POp             | 44 | 392                       | 44  | 10  | 30  | 10.47*                         | (-44,14,24)                | 7.2                                         | <b>2.10</b>                 | 1a,3b,10a                      |
| Precentral G                | 4  | 512                       | 60  | -6  | 44  | 13.35*                         | (-52,-2,48)                | 9.8                                         | 0.95                        | 1a,3b,6a                       |
| Postcentral G               | 4  | 512                       | 48  | -6  | 34  | 11.25*                         | (-48,2,40)                 | 10.0                                        | 1.78                        | 1a,6a,9                        |
| <b>IF- Patients</b>         |    |                           |     |     |     |                                |                            |                                             |                             |                                |
| Left                        |    |                           |     |     |     |                                |                            |                                             |                             |                                |
| Frontal                     |    |                           |     |     |     |                                |                            |                                             |                             |                                |
| IFG- POrb                   | 47 | 152                       | -52 | 28  | -8  | 8.46*                          | (-46,24,-4)                | 8.2                                         | 1.63                        | 4,5,8a                         |
| IFG- PTr                    | 45 | 152                       | -60 | 24  | 12  | 7.93                           | (-56,22,14)                | 4.9                                         | 1.90                        | 5,8a,8b,11                     |
| IFG- PTr                    | 45 | 160                       | -48 | 26  | 18  | 8.19*                          | (-44,24,20)                | 4.9                                         | 1.73                        | 4,8a,8b,11                     |
| IFG- POp                    | 44 | 264                       | -48 | 12  | 14  | 8.41*                          | (-50,14,14)                | 2.8                                         | 0.73                        | 5,8a,8b,11                     |
| Temporal                    |    |                           |     |     |     |                                |                            |                                             |                             |                                |
| MTG                         | 21 | 632                       | -56 | -44 | 0   | 11.33*                         | (-58,-40,2)                | 4.9                                         | <b>2.97</b>                 | 4,5,11                         |
| Right                       |    |                           |     |     |     |                                |                            |                                             |                             |                                |
| Frontal                     |    |                           |     |     |     |                                |                            |                                             |                             |                                |
| IFG- Anterior PTr           | 45 | 144                       | 52  | 30  | 20  | 7.98*                          | (-44,24,20)                | 10.0                                        | 0.78                        | 4,8b,11                        |
| Temporal                    |    |                           |     |     |     |                                |                            |                                             |                             |                                |
| MTG                         | 22 | 648                       | 64  | -36 | 2   | 9.2*                           | (-58,-40,2)                | 7.2                                         | -0.06                       | 7,11,12a,12b                   |
